# Supplementary material
Source: publisher site journal article supplement (https://www.dovepress.com/get_supplementary_file.php?f=362583.xlsx)
Supplement: Supplementary file 1 [file get_supplementary_file.php]

## Sheet: NTM
Supplementary Table 1: Minimum inhibitory concentrations of tedizolid against clinical strains of Nontuberculous Mycobacteria
RGM					SGM
M. abscessus isolates					M. avium complex isolates
Isolate ID	Tedizolid MIC mg/L	Linezolid MIC mg/L			Isolate ID	Tedizolid MIC mg/L	Linezolid MIC mg/L
18-T1507	1	8			HS19002	16	32
B119	2	16			HS19061	16	32
B121	4	32			HS19072	16	32
B256	1	8			HS19085	16	64
B305	1	8			HS19100	32	128
B309	8	32			HS19122B	8	64
B410	1	8			HS19126B	16	32
BY1801	1	8			HS19152	16	64
BY1803	2	16			HS19155	16	32
BY1805	1	16			ZJ1720-2	8	32
HS19007	2	8			HS19175	1	4
HS19011	2	8			HS19189	8	64
HS19030	2	16			HS19209	>32	64
HS19049	2	16			HS21197	4	32
HS19086	2	16			HS21134	8	64
HS19135	2	16			HS21132-2	16	64
HS19147	2	16			HS21193	8	64
HS19194	1	16			HS21135	4	32
HS20005	4	16			HS21157	2	16
HS20072	4	16			HS21123	>32	128
HS20081	1	8			HS20290	8	64
HS20096	2	16			HS20236	16	64
18-T1911	2	16			HS20270	>32	128
ZJ110906	2	32			HS20217	>32	128
					HS20263	16	64
M. massiliense isolates					HS20203	16	64
Isolate ID	Tedizolid MIC mg/L	Linezolid MIC mg/L			HS20129	16	>128
B057	2	16			HS20167	8	32
B244	4	32			HS20125	16	32
B270	4	16			HS20172	>32	64
B278	4	16			HS20073	16	64
BY1802	2	16			HS20148	16	64
HS19051	2	16			HS20285	16	64
HS19075	0.125	0.5			HS20178	8	64
HS19103	2	8			HS20247	16	64
HS20108	4	16			HS20031-1	8	128
18-T2394-2	2	16			HS20158	8	32
18-T2449-2	2	16			HS20056	>32	128
					HS20218	16	64
M. fortuitum isolates					HS20226-1	16	128
Isolate ID	Tedizolid MIC mg/L	Linezolid MIC mg/L
18-A168	8	16			M. kansasii isolates
18-T752	4	16			Isolate ID	Tedizolid MIC mg/L	Linezolid MIC mg/L
18-Z88	0.25	1			18-T1365	0.5	2
B124	8	32			HS19017	0.5	2
B125	4	32			HS19044	0.5	2
B138	4	32			HZ075	0.5	2
B146	4	16			HS19142B	0.25	4
B203	2	16			16-5238	1	4
B238	1	8			HS19043	1	4
B251	1	16			HS19041	1	8
B261	4	32			HS19042	1	8
B262	2	16			HS19057	1	8
B271	2	16			18-T3142	0.5	16
B286	4	16			HS19046	1	16
B294	4	32			16-3046	2	16
B30	4	16			HZ1159	8	16
B319	4	32			18-914	8	32
B497	8	32			HZ1353	8	32
B60	4	32			HS18013	4	64
HS20036	4	8			HS19096	0.25	2
18-T2098	2	8
					M. marinum isolates
M. mucogenicum isolates					Isolate ID	Tedizolid MIC mg/L	Linezolid MIC mg/L
Isolate ID	Tedizolid MIC mg/L	Linezolid MIC mg/L			HS19081	0.125	1
HZ0015	<0.125	<0.5			HS19109	0.25	1
HZ0018	<0.125	<0.5			HS19059	1	4
HZ0021	0.5	2			HS19070	1	16
HS20019	0.125	<0.5			HS19077	1	16
					HS19108	1	8
M. chelonae isolates					HS19110	1	16
Isolate ID	Tedizolid MIC mg/L	Linezolid MIC mg/L			HS19012	2	8
HS19092	0.5	4			HS19067	<0.125	1
					216-1715	<0.125	<0.5
M. ltetiense isolates
Isolate ID	Tedizolid MIC mg/L	Linezolid MIC mg/L			M. virginiense isolates
18-T3254	4	16			Isolate ID	Tedizolid MIC mg/L	Linezolid MIC mg/L
					ZJ1720-1	4	64
					M. gordonae isolates
					Isolate ID	Tedizolid MIC mg/L	Linezolid MIC mg/L
					18-T4029	4	16
					HS2022	0.125	4
